# Supplementary material
Source: PubMed Central journal article supplement (PMC5057396)

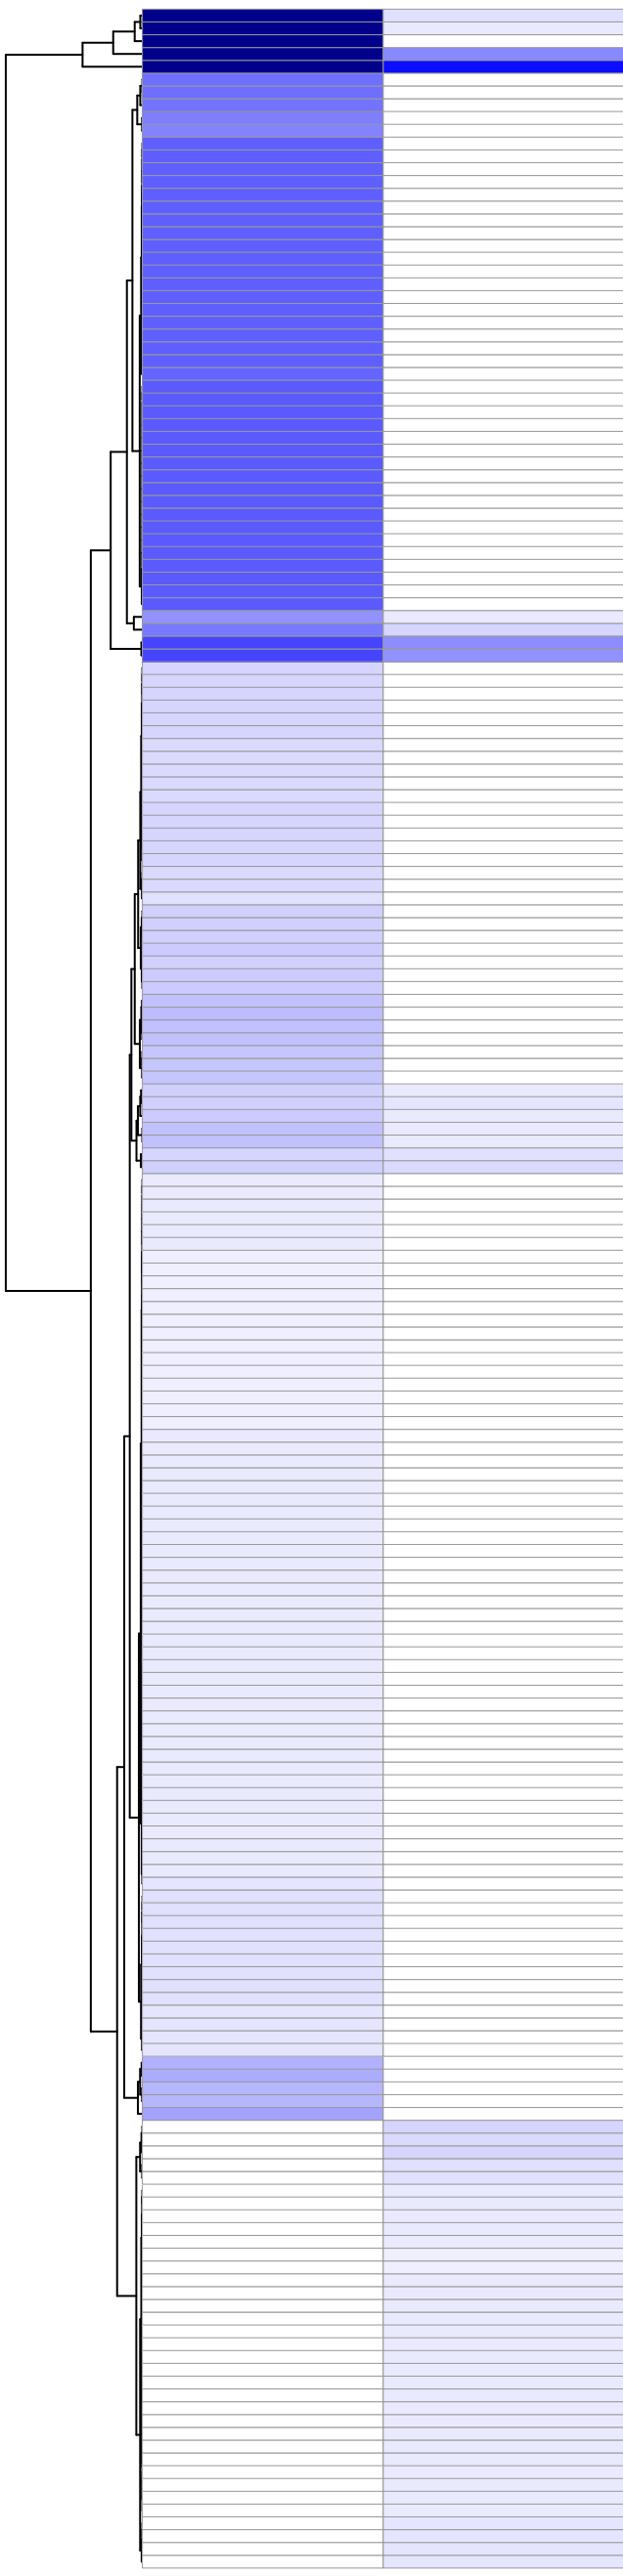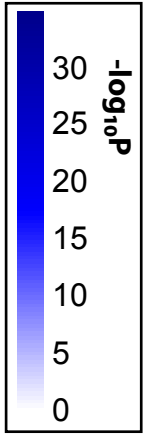

**Fast/  
Continuous**

**Slow**

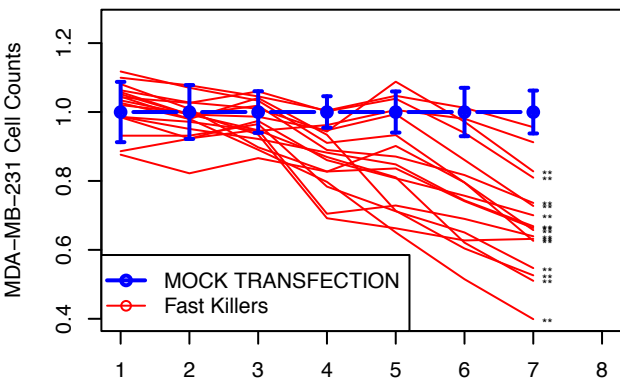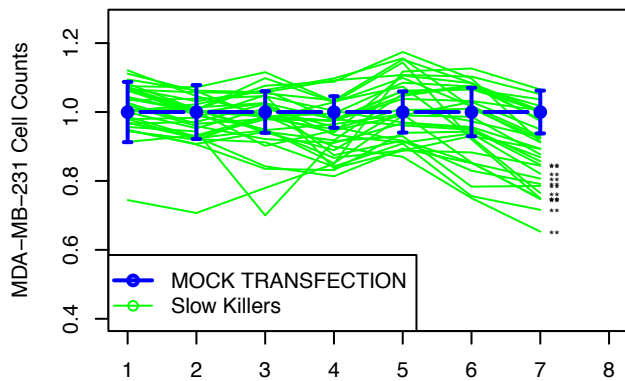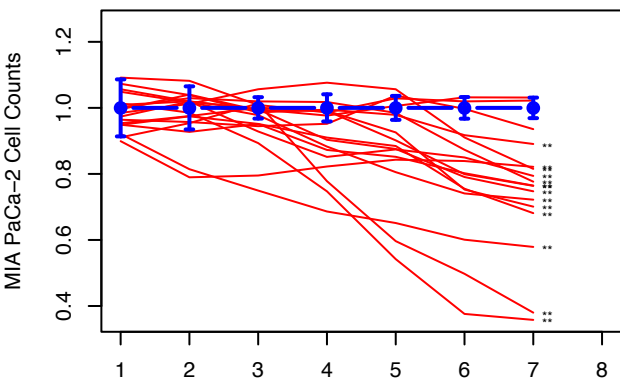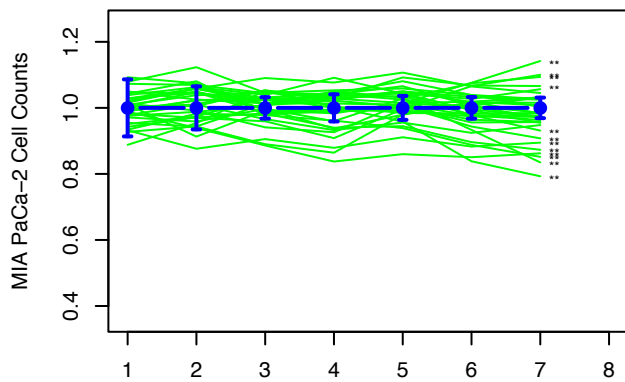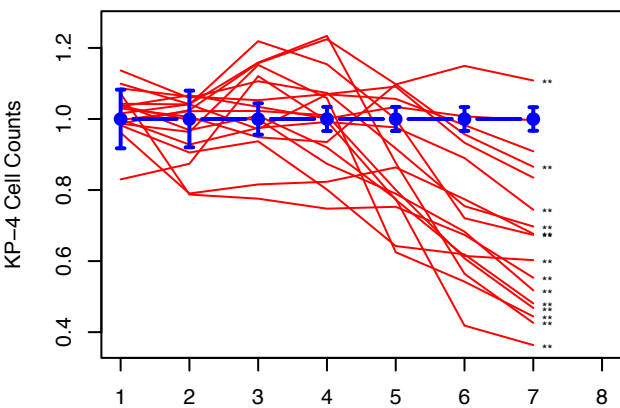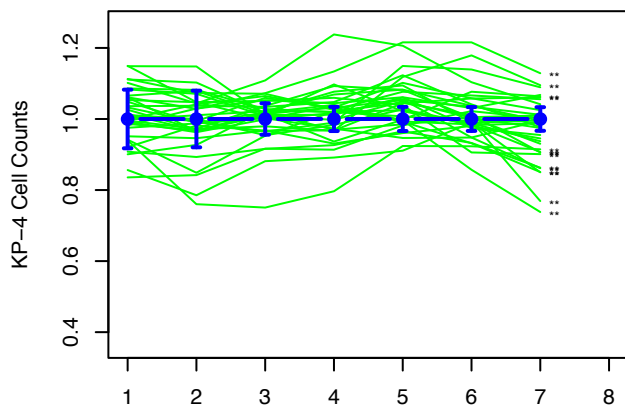

Days Post-Transfection

Days Post-Transfection

**Supplemental Figure 2**

**A)**

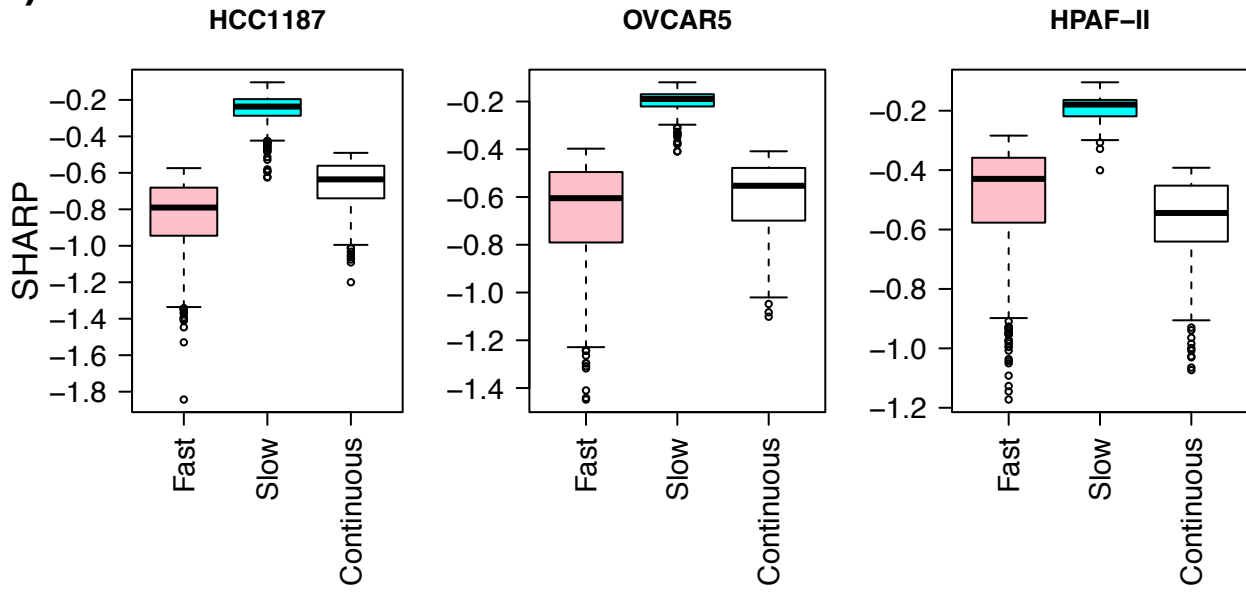

**B)**

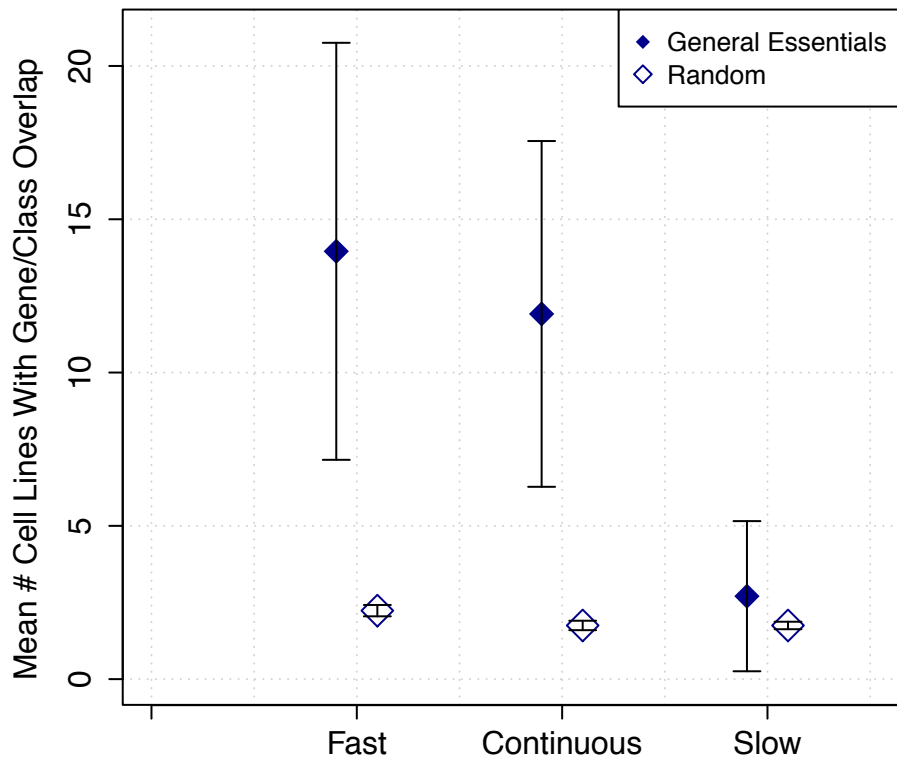

**210 genes**

**134 genes**

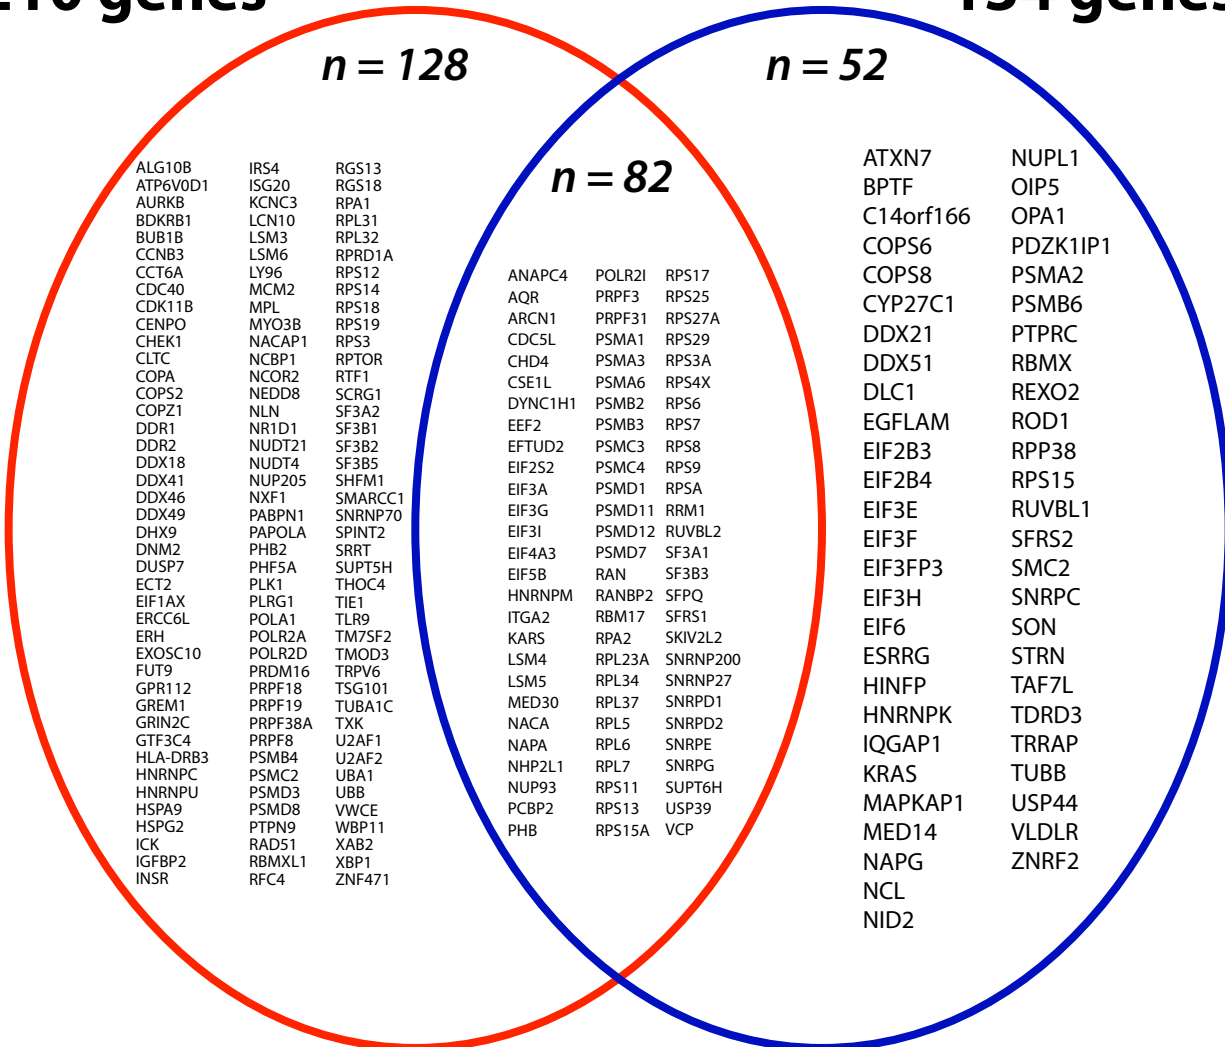

**Marcotte**

**Cheung**

GARP CE's not in BROAD 54k library

|          |        |         |
|----------|--------|---------|
| C12orf66 | INTS9  | RPL3    |
| C14orf2  | KLHL14 | RPL30   |
| C16orf72 | KPNB1  | RPL35   |
| C22orf27 | MDN1   | RPL35A  |
| C3orf39  | MS4A13 | RPL36   |
| C9orf30  | NUF2   | RPL37A  |
| CCT3     | NUP133 | RPL39   |
| CCT7     | NUP88  | RPL4    |
| CCT8     | NUS1   | RPL7A   |
| CEND1    | PSMD6  | RPL9    |
| CMTM3    | RFTN1  | RPLP0   |
| COPB1    | RILPL2 | RPLP1   |
| CYorf15A | RPL10  | RPS20   |
| DYNC112  | RPL10A | RPS26   |
| DYNLRB1  | RPL11  | RPSAP58 |
| EIF3B    | RPL12  | SDAD1   |
| EIF3C    | RPL13  | SEC61A1 |
| EIF3D    | RPL14  | STAG2   |
| EIF4E3   | RPL17  | TEKT2   |
| FAM126A  | RPL18  | TIGD2   |
| FAM164C  | RPL18A | TMEM5   |
| FNDC7    | RPL19  | TUBA1B  |
| FTSJ3    | RPL23  | TUBGCP2 |
| GLIPR1L2 | RPL24  | WDR12v  |
| GPC6     | RPL27  |         |

|  |     |       |       |
|--|-----|-------|-------|
|  | 82  | 128   | 210   |
|  | 52  | 10923 | 10975 |
|  | 134 | 11051 | 11185 |

*FET* p < 1.1 x 10<sup>-112</sup>

**Supplemental Figure 4A**

**133 genes**

**134 genes**

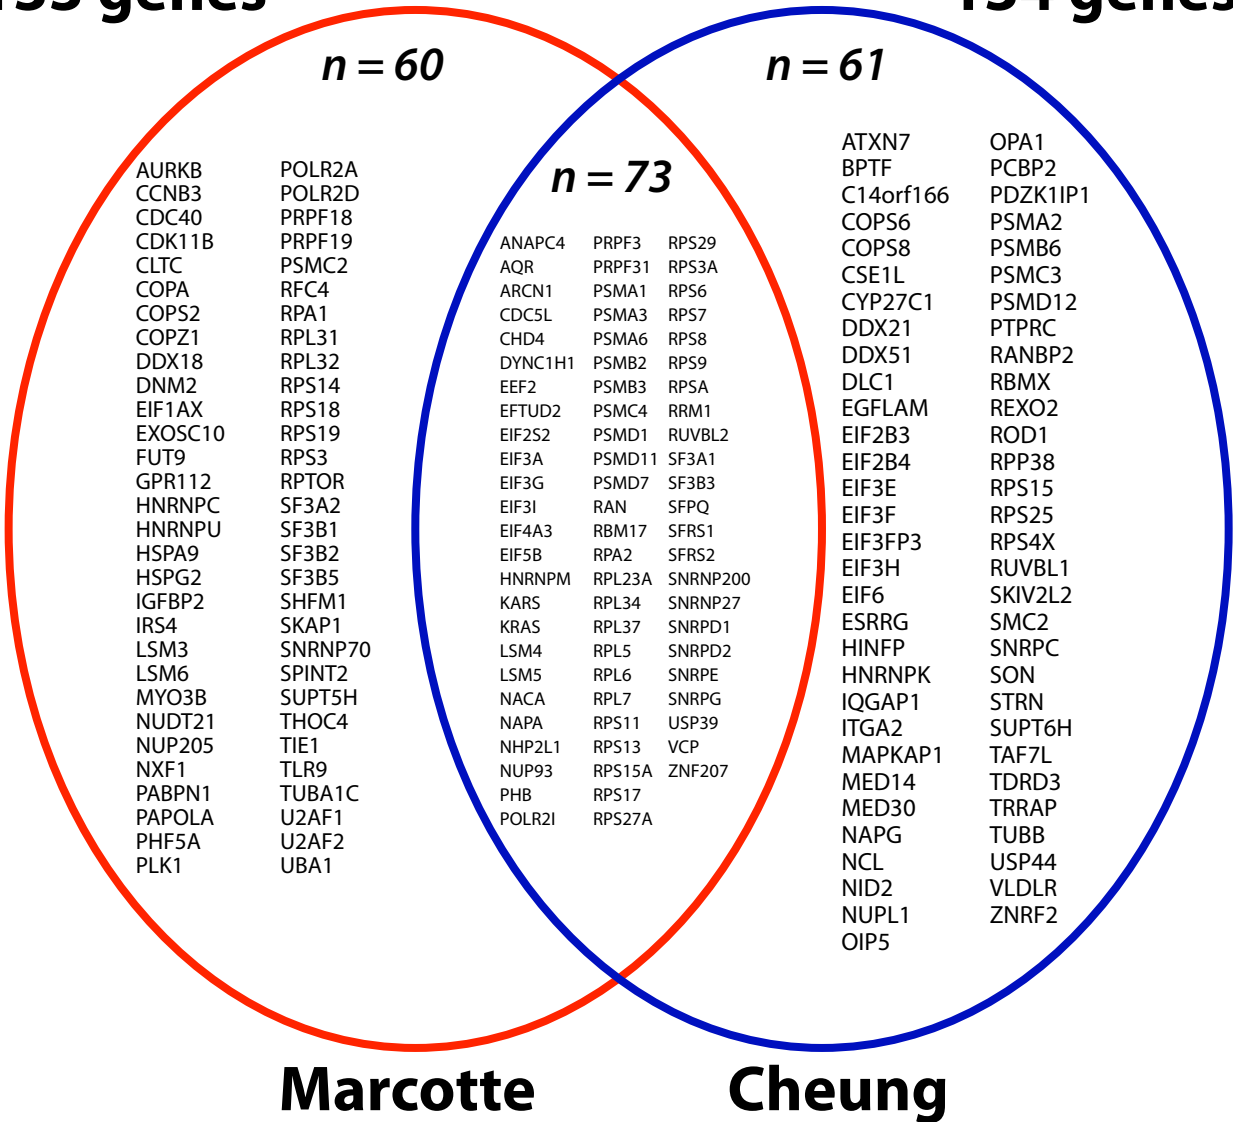

GARP CE's not in BROAD 54k library

|          |        |         |
|----------|--------|---------|
| C12orf66 | RILPL2 | RPL35A  |
| C3orf39  | RPL10  | RPL36   |
| CCT3     | RPL10A | RPL37A  |
| CCT4     | RPL11  | RPL4    |
| CCT7     | RPL12  | RPL7A   |
| CCT8     | RPL13  | RPL9    |
| COPB1    | RPL14  | RPLP0   |
| EIF3B    | RPL17  | RPS20   |
| EIF3C    | RPL18  | RPS26   |
| EIF3D    | RPL18A | RPS27   |
| FAM126A  | RPL19  | RPS28   |
| FTSJ3    | RPL23  | RPSAP58 |
| KPNB1    | RPL24  | TEKT2   |
| MS4A13   | RPL27  | TUBA1B  |
| NUF2     | RPL3   | TUBGCP2 |
| NUP133   | RPL30  |         |
| PSMD6    | RPL35  |         |

|     |       |       |
|-----|-------|-------|
| 73  | 60    | 133   |
| 61  | 10991 | 11052 |
| 134 | 11051 | 11185 |

$FET p < 4 \times 10^{-113}$

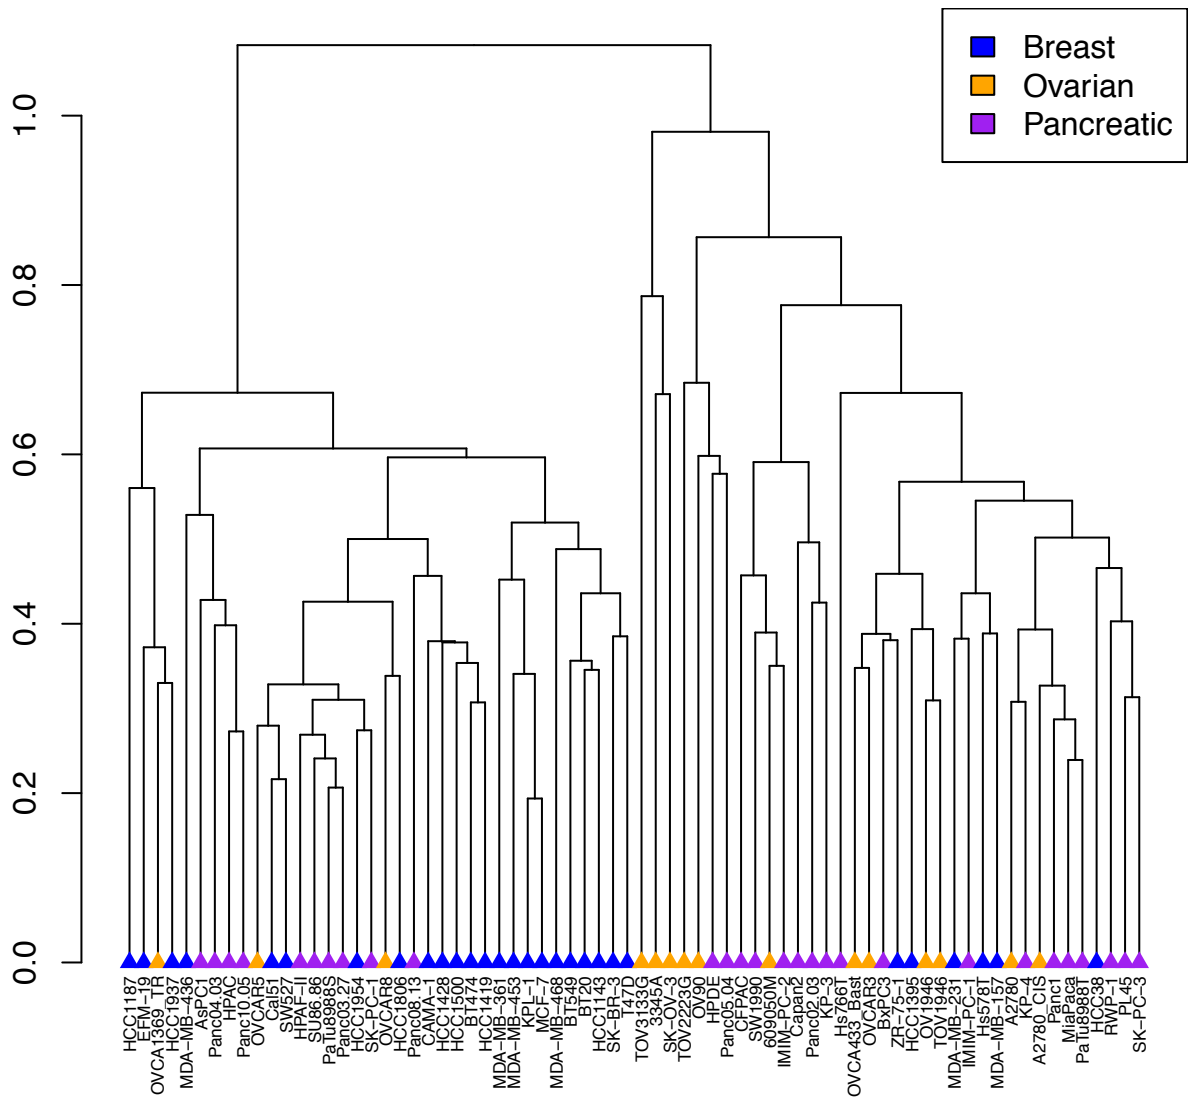

**Supplemental Figure 5**

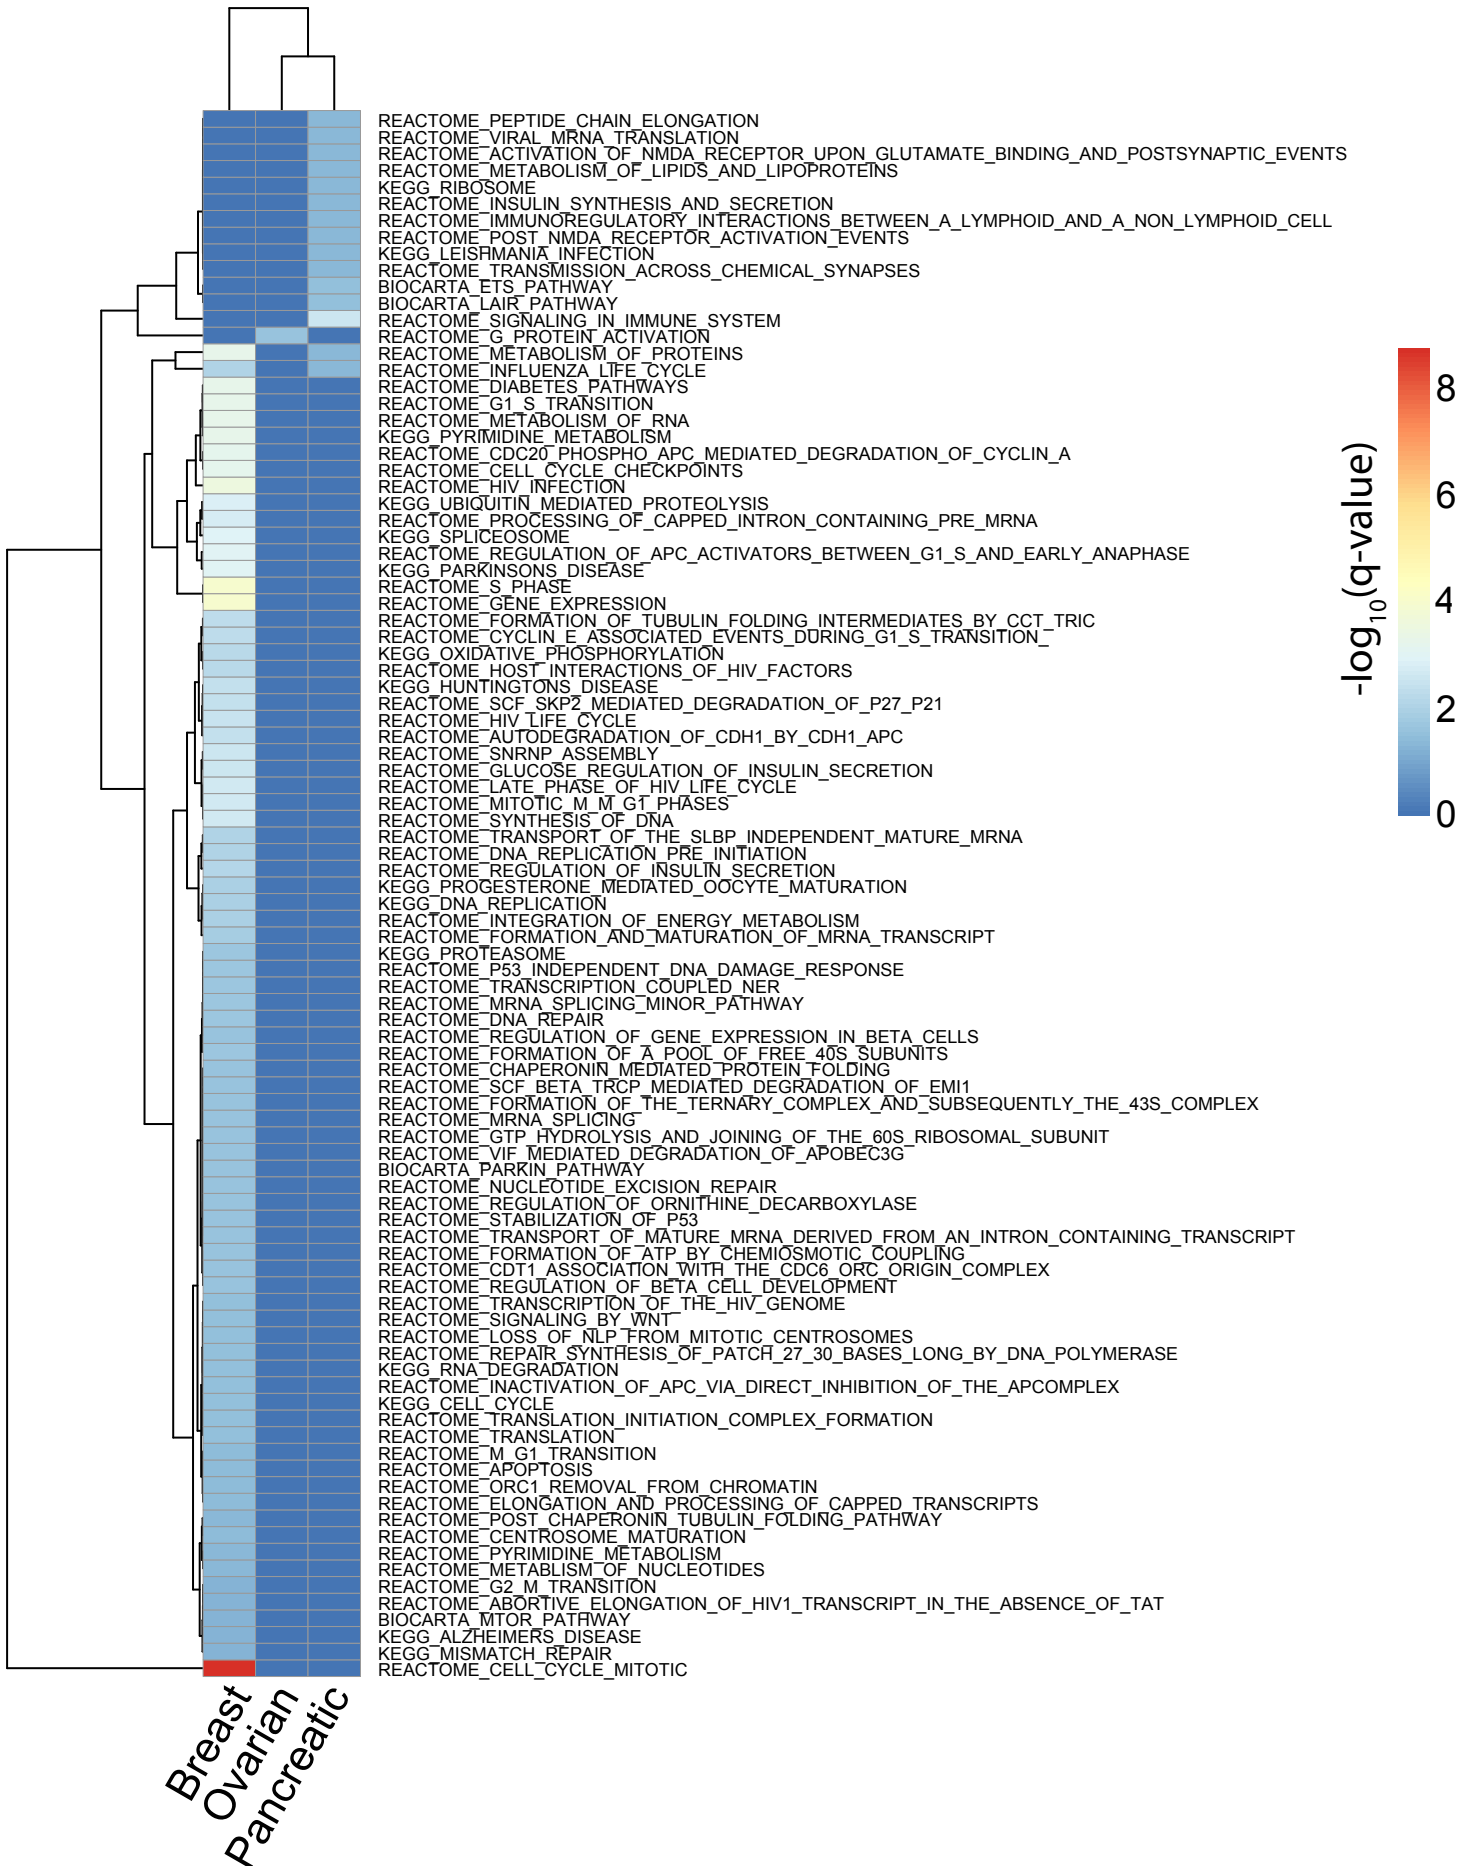

**Supplemental Figure 6**





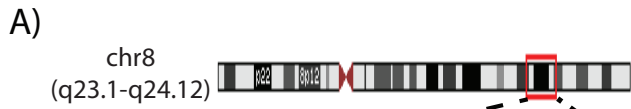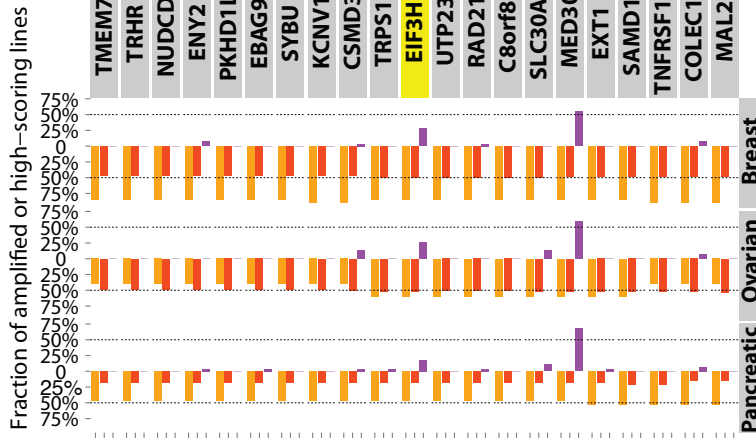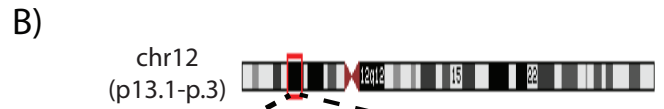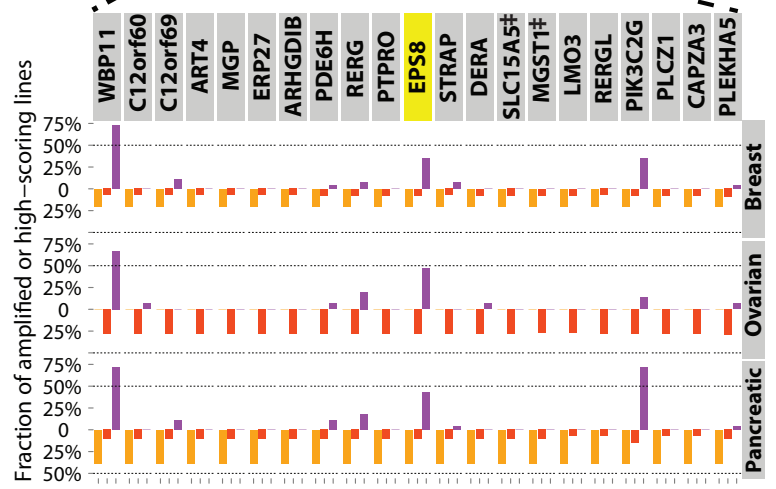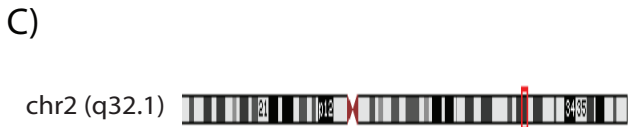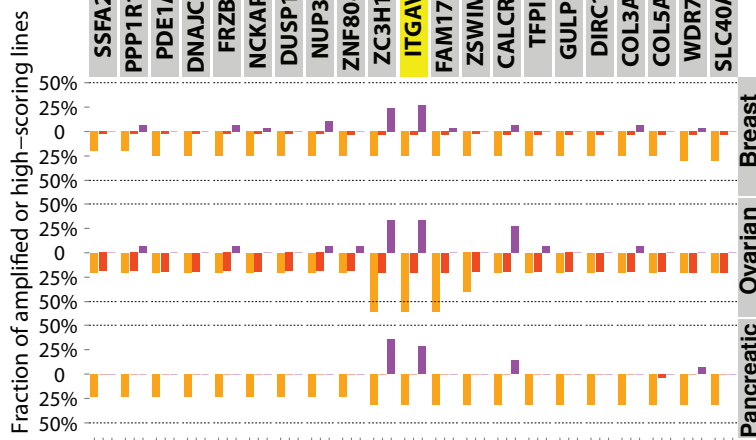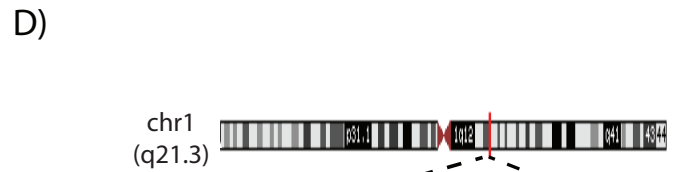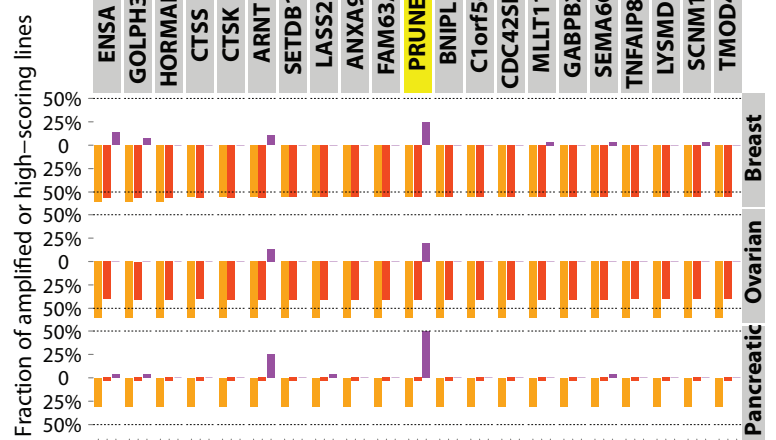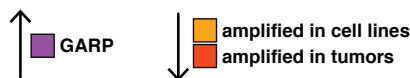

Supplemental Figure 8

E)

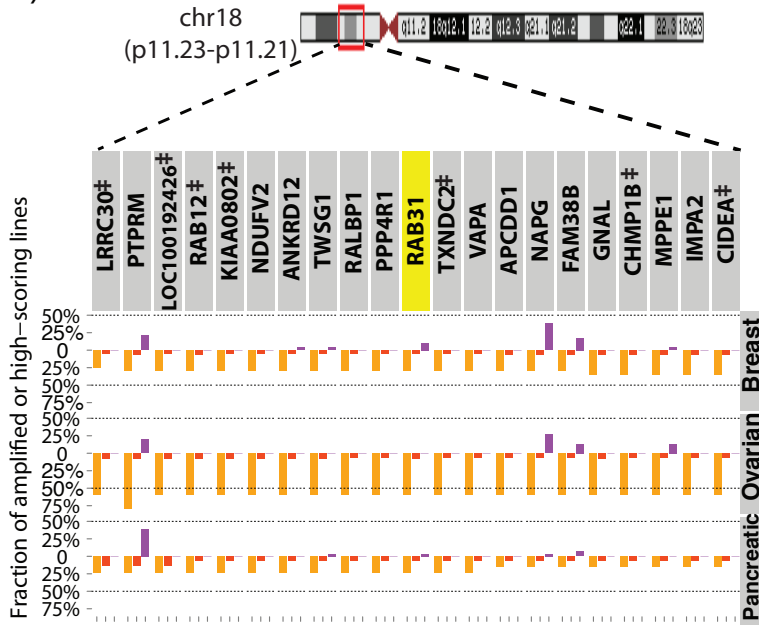

F)

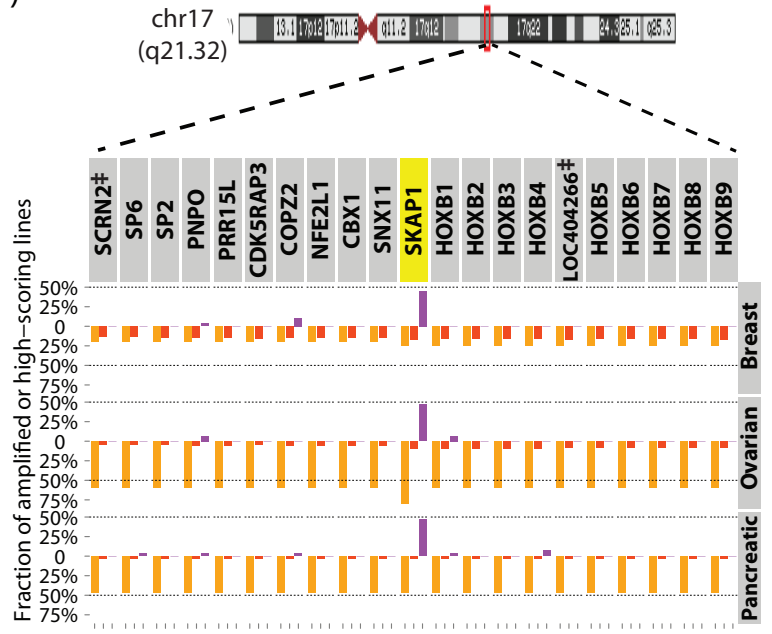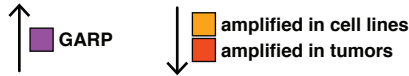

Supplement: NIHMS345985-supplement-14.pdf [file NIHMS345985-supplement-14.pdf]
